# Supplementary material
Source: publisher site journal article supplement (https://apsnet.org/edcenter/learningPP/Documents/PHI-L-2023-05-0003_supplement_3.pdf)
Supplement: Supplementary file 1 [file PHI-L-2023-05-0003_supplement_3.pdf]

### Supplement 3. Sample Rubric

| <b>Description of Activities</b>                                                                              | <b>Excellent (5)</b>                                                                                | <b>Good (4)</b>                                                           | <b>Fair (3)</b>                                                                                                                                  | <b>Poor (2)</b>                                                                                       | <b>Needs Improvement (1)</b>                                                       |
|---------------------------------------------------------------------------------------------------------------|-----------------------------------------------------------------------------------------------------|---------------------------------------------------------------------------|--------------------------------------------------------------------------------------------------------------------------------------------------|-------------------------------------------------------------------------------------------------------|------------------------------------------------------------------------------------|
| Report quality                                                                                                | Well-organized, informative, and addresses the topic with accurate information                      | Well-organized and informative, but could benefit from additional details | Somewhat disorganized or lacks depth, but still demonstrates a basic understanding of the topic                                                  | Disorganized, incomplete, or contains inaccurate information                                          | Unclear, irrelevant, or completely unrelated to the topic                          |
| Select an appropriate rating scale                                                                            | Accurately identifies an appropriate rating scale                                                   | Struggled to identify an appropriate rating scale                         | Demonstrates a fair understanding and selection of the appropriate rating scale                                                                  | Demonstrates limitation in selecting the appropriate rating scale                                     | Did not identify an appropriate rating scale                                       |
| Provide a brief disease symptom description                                                                   | Clear and concise, providing a thorough understanding of the disease                                | Clear and concise, but lacks some detail                                  | Somewhat unclear, and/or lacks significant details                                                                                               | Unclear or confusing, making it difficult to understand                                               | Completely unclear or inaccurate, demonstrating no understanding of the disease    |
| Provide adequate disease assessment and a justification for the rating selection                              | Comprehensive, detailed, and shows evidence of extensive research and critical thinking             | Accurate and demonstrates fair research                                   | Justification provided, but lacks details and/or shows inadequate research                                                                       | Contains some accurate information, but includes significant errors                                   | Incomplete and shows a lack of understanding                                       |
| Discuss problems, weaknesses, and strengths of their disease assessment (points earned as discussed in class) | Demonstrates detailed insights into problems, weaknesses, and strengths of their disease assessment | Identifies some weaknesses and/or strengths of their disease assessment   | Limited discussion of strengths and weaknesses; may list those discussed generally in class, but does not apply them to analyze their assessment | Demonstrates limitation in identifying problems, weaknesses, or strengths of their disease assessment | Did not discuss any problems, weaknesses, or strengths of their disease assessment |
| Total score                                                                                                   |                                                                                                     |                                                                           | 25 points                                                                                                                                        |                                                                                                       |                                                                                    |
